# Supplementary material for: Bioinspired leaf vein-architected gold nanowire ecoflexible biosensors for ultrasensitive occlusal force monitoring
Source: Royal Society of Chemistry journal article supplement (doi:10.1039/d5mh00460h), 2025-01-01
Supplement: d5mh00460h1.pdf [file d5mh00460h1.pdf]

## Supporting Information

# Bioinspired Leaf Vein-Architected Gold Nanowire Ecoflexible Biosensors for Ultrasensitive Occlusal Force Monitoring

*Wuxing Zhang<sup>1, †</sup>, Heng Zhang<sup>1, 2 †</sup>, Gangsheng Chen<sup>1</sup>, Biao Ma<sup>1</sup>, Yang Xia<sup>3</sup>, Yi Chen<sup>1, 2 \*</sup>*

<sup>1</sup> State Key Laboratory of Digital Medical Engineering, Jiangsu Key Laboratory for Biomaterials and Devices, School of Biological Science and Medical Engineering, Southeast University, Nanjing 211189, China

<sup>2</sup> Southeast University-Monash University Joint Graduate School, Suzhou 215123, China

<sup>3</sup> The Affiliated Stomatological Hospital of Nanjing Medical University, Nanjing 210029, China

<sup>†</sup> These authors contributed equally to this work.

<sup>\*</sup> To whom correspondence should be addressed.

Email: yichen@seu.edu.cn (Y. Chen)

# Table of Contents

|    |                                                                                                 |    |
|----|-------------------------------------------------------------------------------------------------|----|
| 1  |                                                                                                 |    |
| 2  |                                                                                                 |    |
| 3  | Section 1. Materials and Methods .....                                                          | 4  |
| 4  | Section 2. Preparation of Leaf Vein Venation Skeleton .....                                     | 8  |
| 5  | Section 3. Leaf Vein-Architected AuNWs Electrode .....                                          | 10 |
| 6  | Section 4. Leaf Vein-Architected AuNWs Electrode Induced by 4 nm Gold Nanoparticle ....         | 14 |
| 7  | Section 5. AuNWs Growth on Various Types of Leaf Veins.....                                     | 16 |
| 8  | Section 6. Permeability Characterization .....                                                  | 18 |
| 9  | Section 7. Sheet Resistance of the Vein-Architected AuNWs Electrode under Different Growth Time |    |
| 10 | .....                                                                                           | 19 |
| 11 | Section 8. Vein-architected AuNWs Ecoflexible Sensor .....                                      | 20 |
| 12 | Section 9. Comparison of Mechanical Properties Between Unmodified and AuNWs-Modified Sensors    |    |
| 13 | .....                                                                                           | 22 |
| 14 | Section 10. The Resistance Responses during a Stretch-Release Cycle .....                       | 23 |
| 15 | Section 11. Gauge Factor (GF) Evaluation.....                                                   | 24 |
| 16 | Section 12. Comparison between Leaf Vein-Architected AuNWs Ecoflexible Sensor and PDMS Film-    |    |
| 17 | Based AuNWs Sensor.....                                                                         | 25 |
| 18 | Section 13. Current-Voltage Response under Strain .....                                         | 26 |
| 19 | Section 14. Real Time Detection of Wrist Pulse Signals .....                                    | 27 |
| 20 | Section 15. Current-Voltage Response under Pressure .....                                       | 28 |

|    |                                                                                             |    |
|----|---------------------------------------------------------------------------------------------|----|
| 21 | Section 16. Mechanism of Resistance Variation under Mechanical Deformation .....            | 29 |
| 22 | Section 17. Stepwise Pressure Response Curve of the Leaf Vein-architected AuNWs Ecoflexible |    |
| 23 | Sensor .....                                                                                | 30 |
| 24 | References.....                                                                             | 33 |
| 25 |                                                                                             |    |
| 26 |                                                                                             |    |
| 27 |                                                                                             |    |
| 28 |                                                                                             |    |
| 29 |                                                                                             |    |

## 30 Section 1. Materials and Methods

31 **Chemicals and Regents:** Hydrogen tetrachloroaurate(III) trihydrate ( $\text{HAuCl}_4 \cdot 3\text{H}_2\text{O}$ ,  $\geq 99.0\%$   
32 Au basis), L(+)-ascorbic acid (L-AA,  $\geq 99\%$ ), trisodium citrate dihydrate ( $\geq 99\%$ ), (3-  
33 aminopropyl)-triethoxysilane (APTES,  $\geq 98\%$ ), and 4-mercaptobenzoic acid (4-MBA,  $\geq 90\%$ )  
34 were purchased from Sigma Aldrich. NaOH was purchased from Shanghai Titan Scientific Co.  
35 Ltd. The PDMS and cross-linker (SYLGARD 184) were purchased from USA Dow Corning  
36 Co. Ltd. Silver nitrate ( $\text{AgNO}_3$ ,  $\geq 99\%$ ) and was purchased from Aladdin. Ethanol (analytical  
37 grade) was purchased from Greagent. Hydrochloric acid (HCl, analytical grade) was purchased  
38 from Sinopharm Chemical Reagent Co. Ltd. (Shanghai, China).

39

40 **Preparation of Leaf Vein:** The Osmanthus leaves were immersed in NaOH (40g, 400 ml)  
41 solution at 100 °C for 2 h. We used the brush to remove the leaf flesh from the etched leaves,  
42 and then rinsed them with deionized water. Then the veins of the leaves were pressed flat with  
43 glass and dried in a blast drying oven (GZX-9240MBE) at 60°C.

44

45 **Synthesis of Gold Nanostars:** Gold nanostars were synthesized according to previously  
46 reported seed-mediated method<sup>1</sup>, which were surfactant-free. The gold seed with a diameter of  
47 12 nm were prepared by adding 3.75 mL citrate solution (34 mM) to 50 ml of boiling  $\text{HAuCl}_4$   
48 solution (1 mM) under vigorous stirring. The solution was boiling for 15 min, then cooled to  
49 room temperature and stored at 4°C. Then, 200  $\mu\text{L}$  of the above gold seed was added to a 20 ml  
50  $\text{HAuCl}_4$  (0.25 mM) solution containing 20  $\mu\text{L}$  HCl (1M) at room temperature under a stirring  
51 of 700 rpm. Quickly, 100  $\mu\text{L}$  AA (0.1 M) and 200  $\mu\text{L}$   $\text{AgNO}_3$  (3 mM) were added

52 simultaneously and the solution was retaining stirring for 30s. The obtained gold nanostars were  
53 kept at 4°C until used.

54

55 ***Fabrication of Vein-architected AuNWs Electrode:*** The composite of liquid PDMS and cross-  
56 linker with a weight ratio of 20:1 was poured into the biological culture dish, then the vein of  
57 Osmanthus leaves were put into the biological culture dish. Subsequently, remove the excess  
58 PDMS from the vein of Osmanthus leaves and place them in a 60°C drying oven overnight for  
59 culturing. The vein-architected AuNWs electrode was obtained by directly growing gold  
60 nanowires on the surface of PDMS with a modified seed-mediated metho<sup>2, 3</sup>. Firstly, the the  
61 vein of Osmanthus leaves were attached to the microslide in order to get a flat surface. Then O<sub>2</sub>  
62 plasma was used to make the PDMS of the vein of Osmanthus leaves hydrophilic (treatment  
63 time, 10 min). Immediately, the vein of Osmanthus was soaked in the APTES aqueous solution  
64 (4 mM) for 2h to be functionalized with amino groups. Subsequently, APTES-modified the  
65 vein of Osmanthus leaves were immersed into the prepared gold nanostars solution for 2h in  
66 order to make gold nanostars fully adsorbed. After rinsing with deionized water three times to  
67 remove the weakly bound gold nanostars, the vein of Osmanthus leaves was transferred to  
68 another clean microslide and finally immersed into a growth solution containing 10.8 mM 4-  
69 MBA, 11.7 mM HAuCl<sub>4</sub>, and 27 mM L-AA for 15 min. After rinsing (ethanol) and drying, the  
70 obtained bendable veins were used as working electrode for electrochemical properties test.

71

72 ***Preparation of Vein-architected AuNWs Ecoflexible Sensor:*** The proportional mixture of  
73 liquid PDMS and crosslinker 10:1 was poured into a 50 ml centrifuge tube, about 10 g and then

74 vacuum in a vacuum drying tank (DZG-6050) for about 30 minutes. The vein of Osmanthus  
75 leaves was connected with wires by silver glue, followed by curing at 60 °C for 30 min in a  
76 drying oven. The composite of liquid PDMS and cross-linker with a weight ratio of 10:1 were  
77 poured into the biological culture dish, then the biological dish was placed in the compact  
78 homogenizer and set the rotation speed and time (200 r/min, 10s), subsequently, the The vein  
79 of Osmanthus leaves were put into the biological culture dish for encapsulation. After cured at  
80 80°C for 1 h in the drying oven, the synthesized Vein-PDMS film were peeled off from the  
81 biological culture dish.

82

83 ***Human Motion Monitoring Measurement:*** The experiment protocols were approved by the  
84 Ethics Committee of Southeast University. The strain tests were conducted by attaching the leaf  
85 vein-architected AuNWs ecoflexible sensor to dynamic regions of the human body, such as the  
86 finger, elbow, wrist, knee, and throat. Mechanical deformations induced by natural bending  
87 movements provided various levels of external strain. The electrical signals generated by the  
88 sensor were measured and recorded in real time using a SourceMeter.

89

90 ***Pressure Response Measurement:*** The pressure tests were conducted by placing the sensor  
91 flatly on a clean, horizontal substrate. Different levels of constant pressure were applied to the  
92 sensor, and the corresponding electrical responses were monitored using a SourceMeter.

93

94 ***Human Bite Force Measurement:*** The experiment protocols were approved by the Ethics  
95 Committee of Southeast University. A healthy male subject was recruited from Southeast  
96 University and gave written informed consent before participation in the study. Before the

97 experiment, the oral cavity of the human subject was cleaned. Subsequently, vein-architected  
98 AuNWs ecoflexible sensors were placed flat on the occlusal surfaces of the incisors, canines,  
99 and molars of the human subject. A SourceMeter was then used to record the resistance  
100 variations during the biting process under gentle, moderate, and firm bite forces.

101

102 **Characterization:** The morphology of the vein-architected AuNWs electrode was investigated  
103 by field emission scanning electron microscopy (Nova NanoSEM 450). XRD patterns were  
104 recorded using a Bruker D8 Advance diffractometer using Cu K $\alpha$  radiation. XPS spectra were  
105 obtained using the Thermo Fisher ESCALAB 250Xi X-ray photoelectron spectroscopy.

106

107 **Section 2. Preparation of Leaf Vein Venation Skeleton**

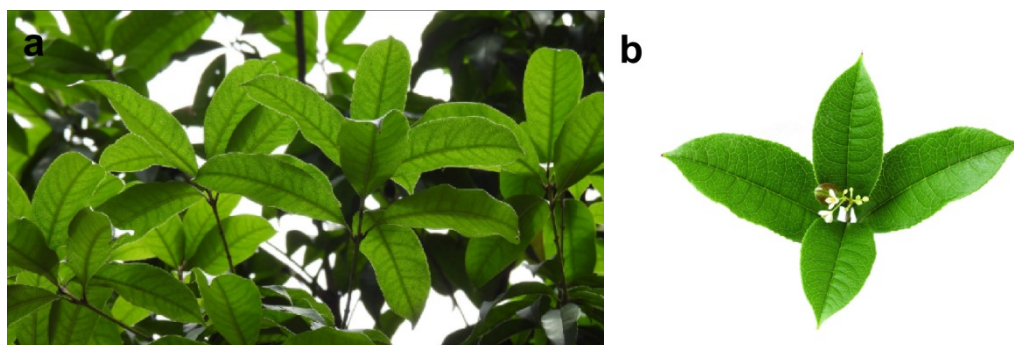

108  
109 **Figure S1.** The picture of The Osmanthus leaves.  
110



111

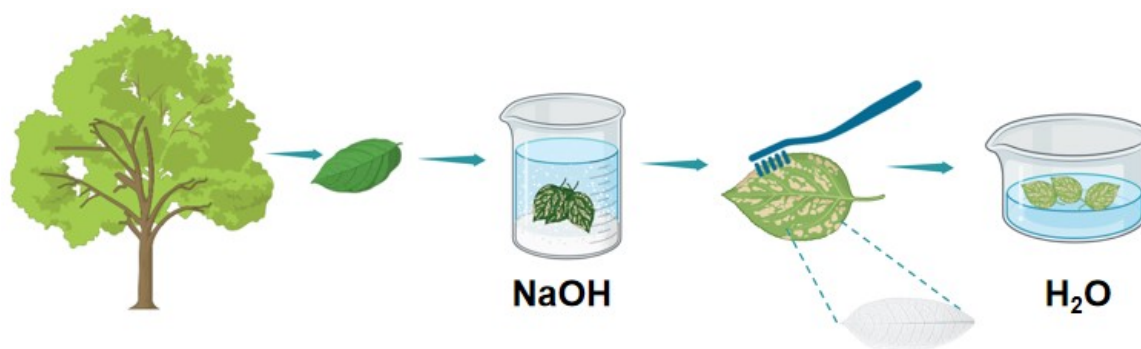

112

113

**Figure S2.** Schematic illustration for the preparation process of the leaf vein venation skeleton.

114

115

### 116 Section 3. Leaf Vein-Architected AuNWs Electrode

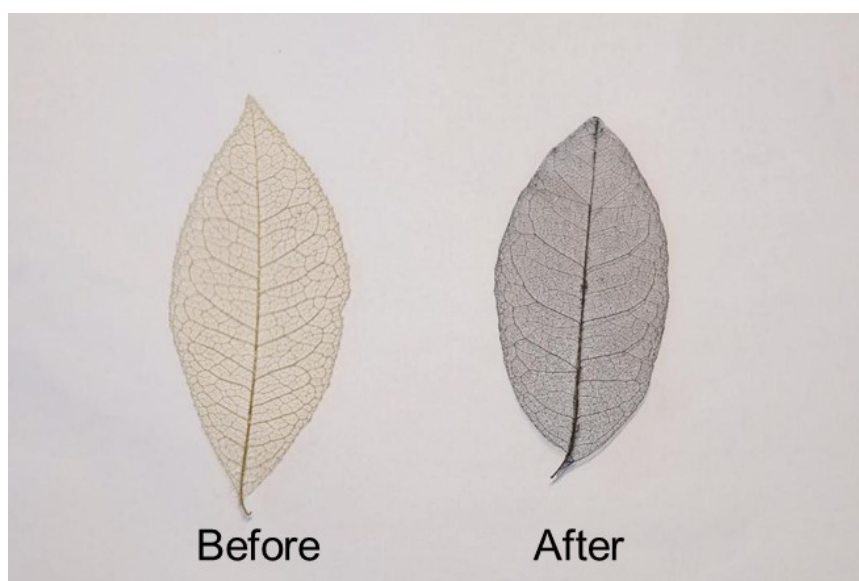

117

118 **Figure S3.** Optical image of the vein-architected AuNWs electrode before and after growth of AuNWs.

119

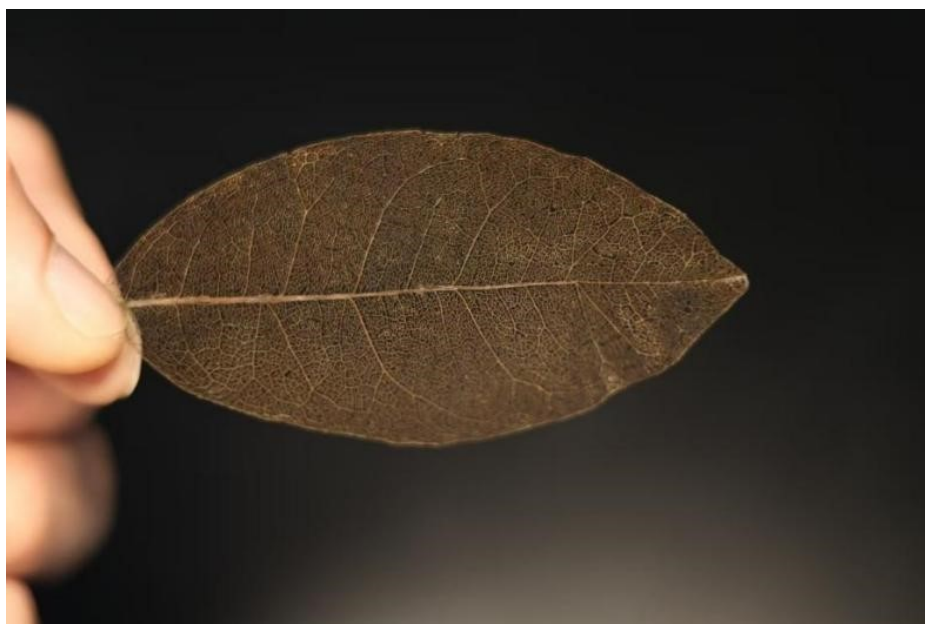

120

121 **Figure S4.** Optical image of the leaf vein-architected AuNWs electrode placed under warm-toned lighting.

122

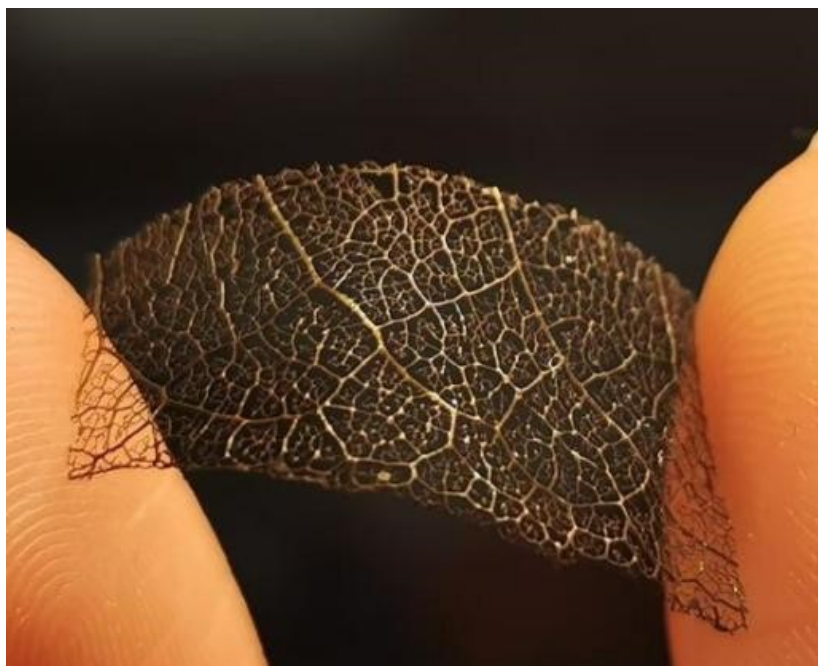

**Figure S5.** Optical image of the leaf vein-architected AuNWs electrode in a bent state.

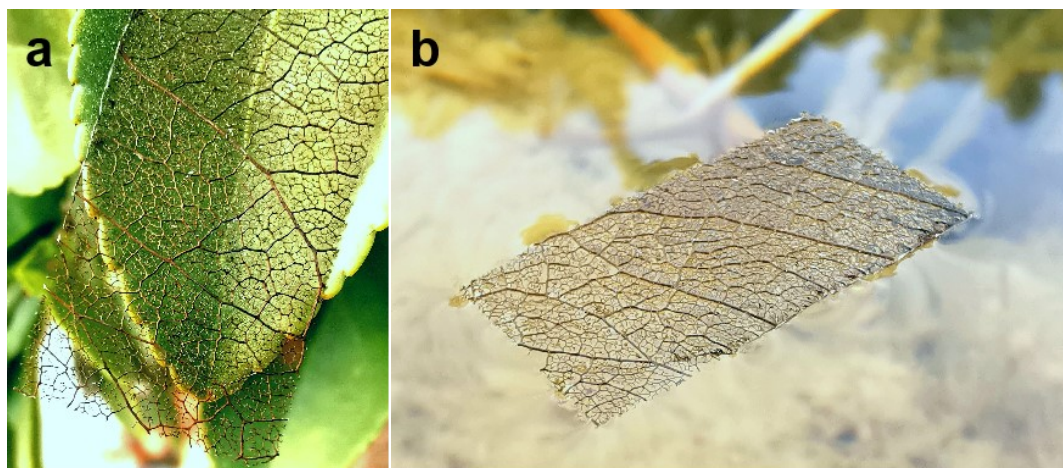

126

127 **Figure S6.** Optical images of the leaf vein-architected AuNWs electrode placed on a leaf and the surface of  
128 water.

129

130 **Section 4. Leaf Vein-Architected AuNWs Electrode Induced by 4 nm Gold**

131 **Nanoparticle**

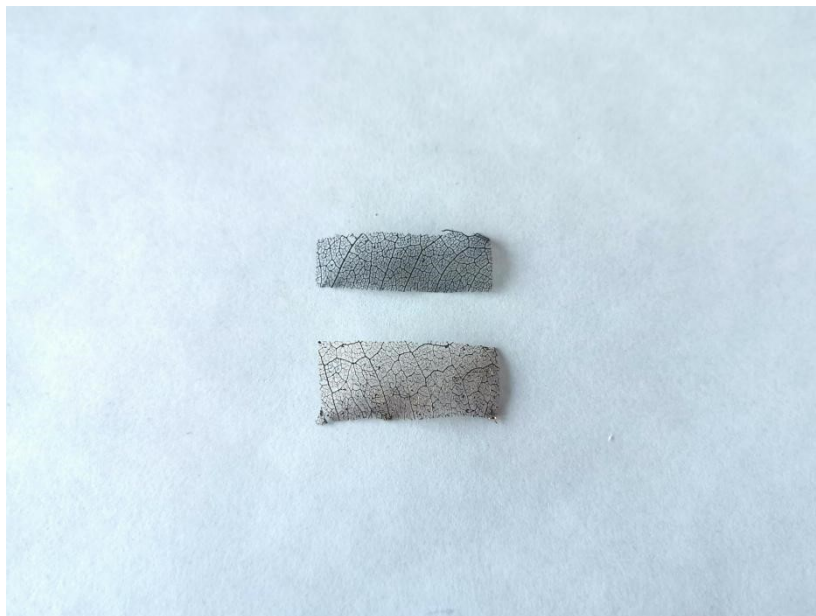

132

133 **Figure S7.** Optical image of leaf vein-architected AuNWs electrodes induced by gold nanostars (top) and

134 4 nm gold nanoparticles (bottom).

135

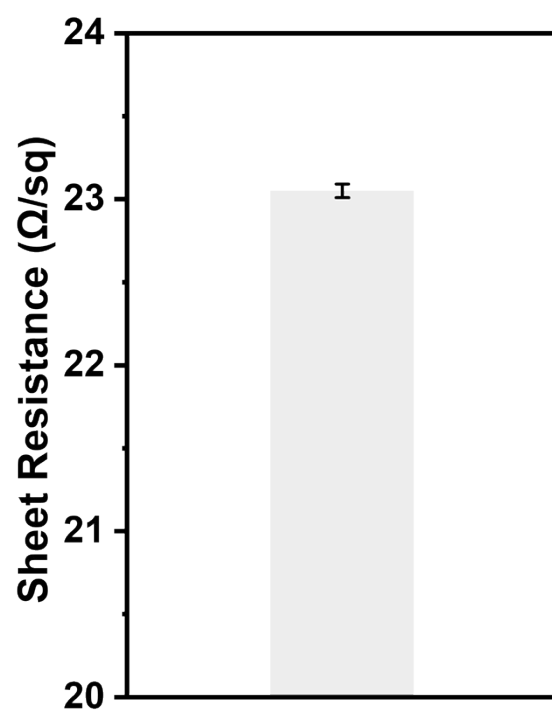

136

137 **Figure S8.** The sheet resistance of the leaf vein-architected AuNWs electrode induced by 4 nm gold  
138 nanoparticle.

139

140 **Section 5. AuNWs Growth on Various Types of Leaf Veins**

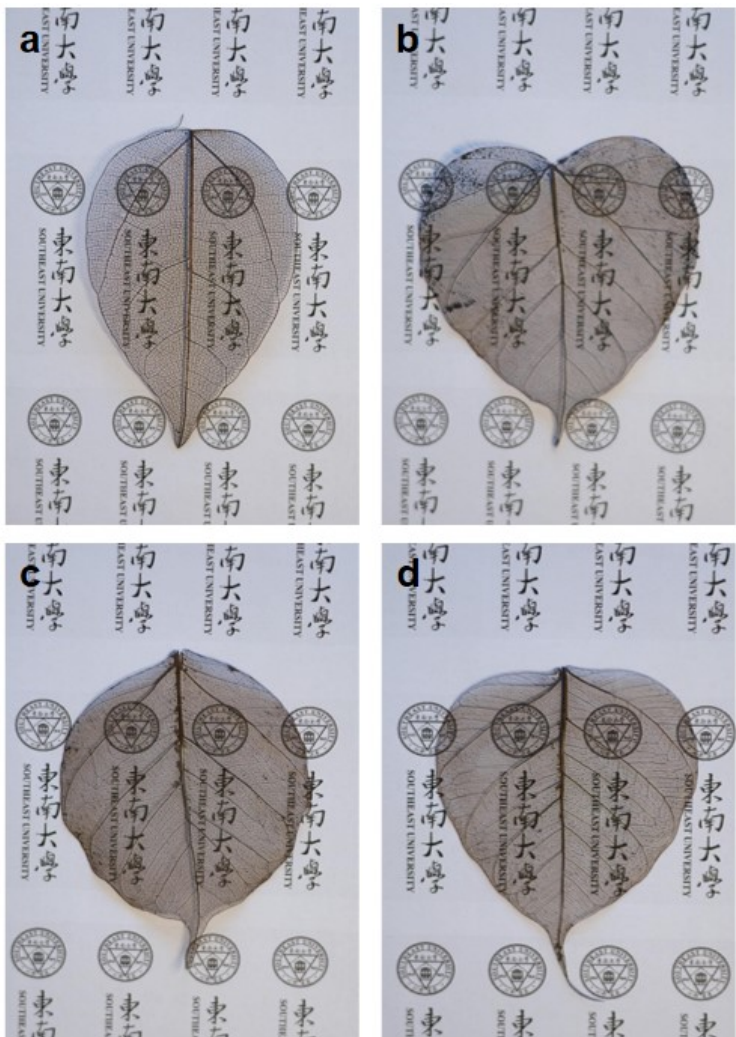

141  
142 **Figure S9.** Optical images of leaf vein-architected AuNWs electrode using different types of leaves as  
143 substrates.  
144



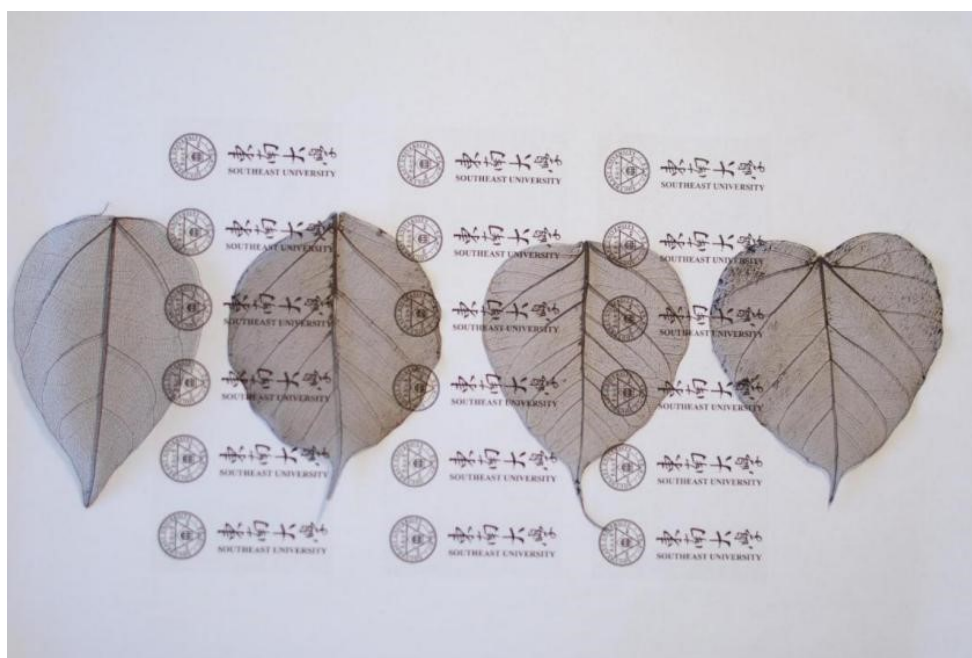

145

146 **Figure S10.** Optical image of different types of leaves. From left to right: ginseng leaf vein, poplar leaf vein,  
 147 bodhi leaf vein, magnolia leaf vein.

148

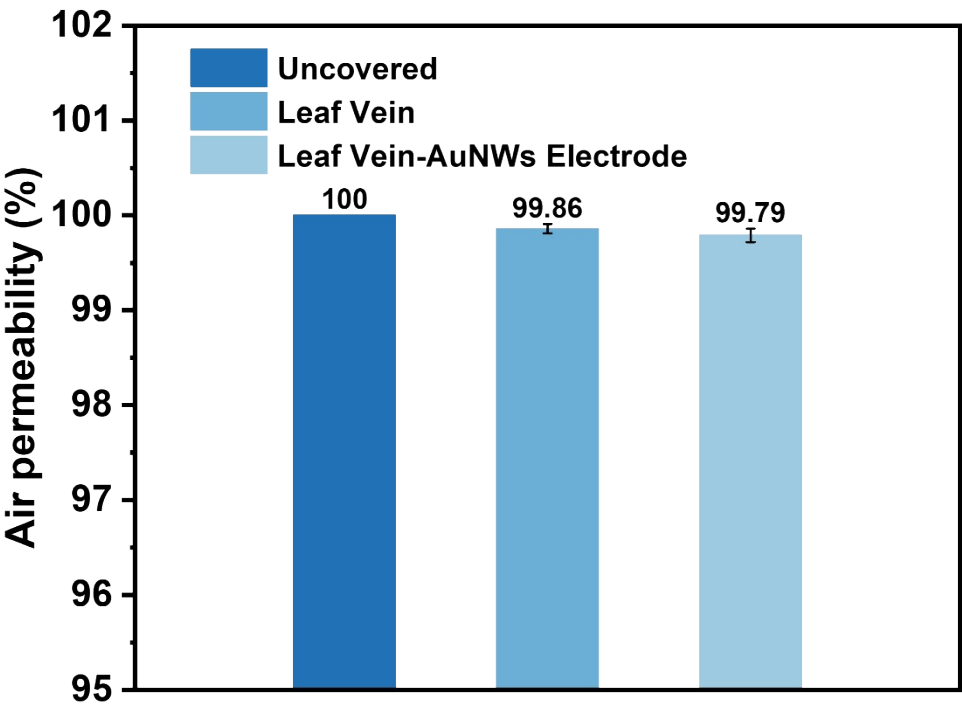

Figure S11. The Characterization of air permeability.

150  
151  
152  
153  
154  
155

156 **Section 7. Sheet Resistance of the Vein-Architected AuNWs Electrode under**

157 **Different Growth Time**

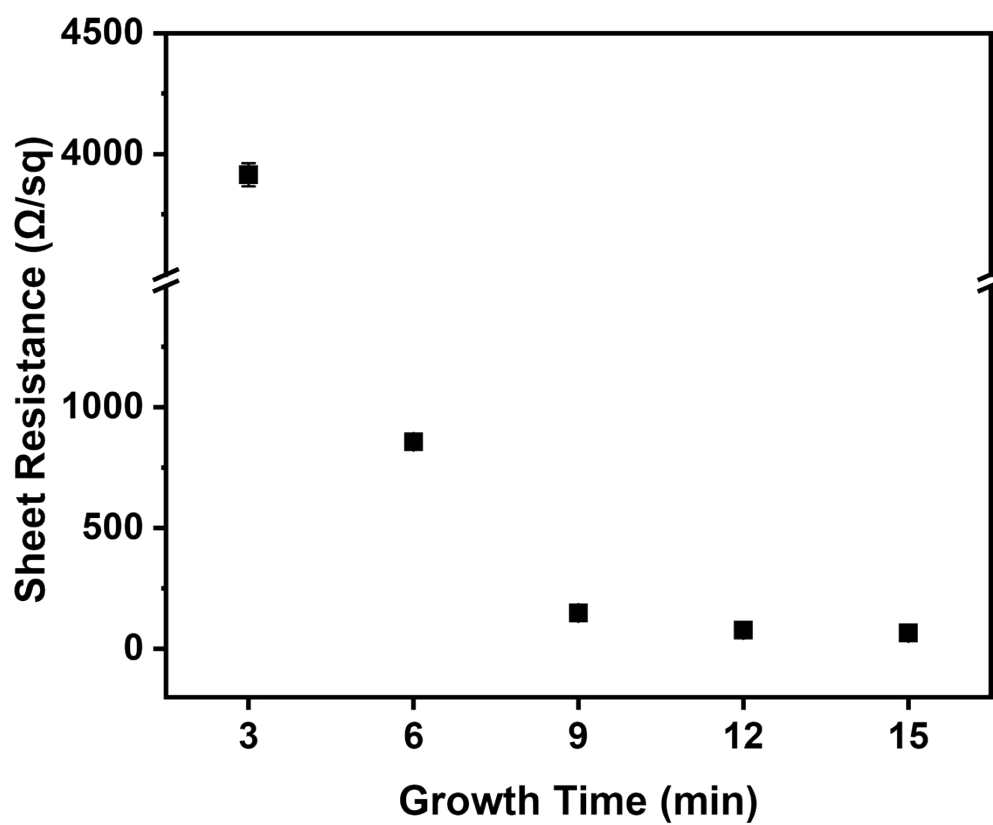

158 **Figure S12.** The sheet resistance magnitude under different growth time.

161 **Section 8. Vein-architected AuNWs Ecoflexible Sensor**

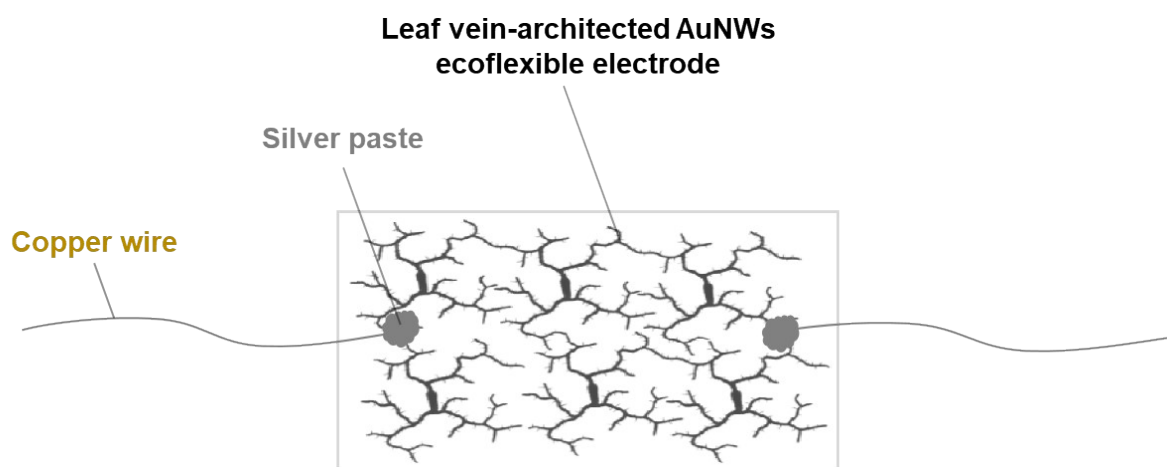

162

163 **Figure S13.** Electrical contacts were fabricated by connecting external copper wires to leaf vein-architected  
164 AuNWs electrode using silver paste.

165

166

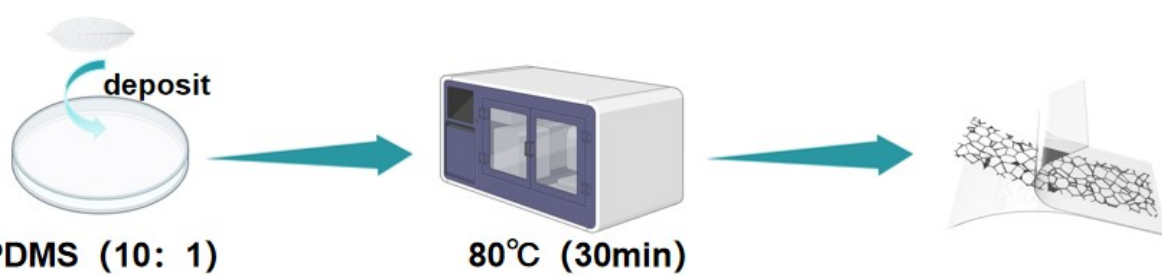

167

168 **Figure S14.** The Schematic of the fabrication process for the leaf vein-architected AuNWs ecoflexible  
169 sensor.

170

171 **Section 9. Comparison of Mechanical Properties Between Unmodified and**  
172 **AuNWs-Modified Sensors**

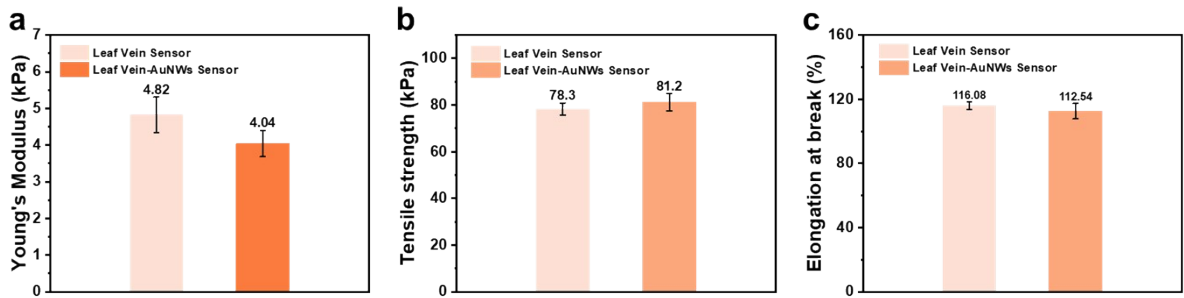

173  
174 **Figure S15.** (a) Comparison of Young' s Modulus (within 50% tensile strain). (b) Comparison of tensile  
175 strength. (c) Comparison of elongation at break.

176

177 **Section 10. The Resistance Responses during a Stretch-Release Cycle**

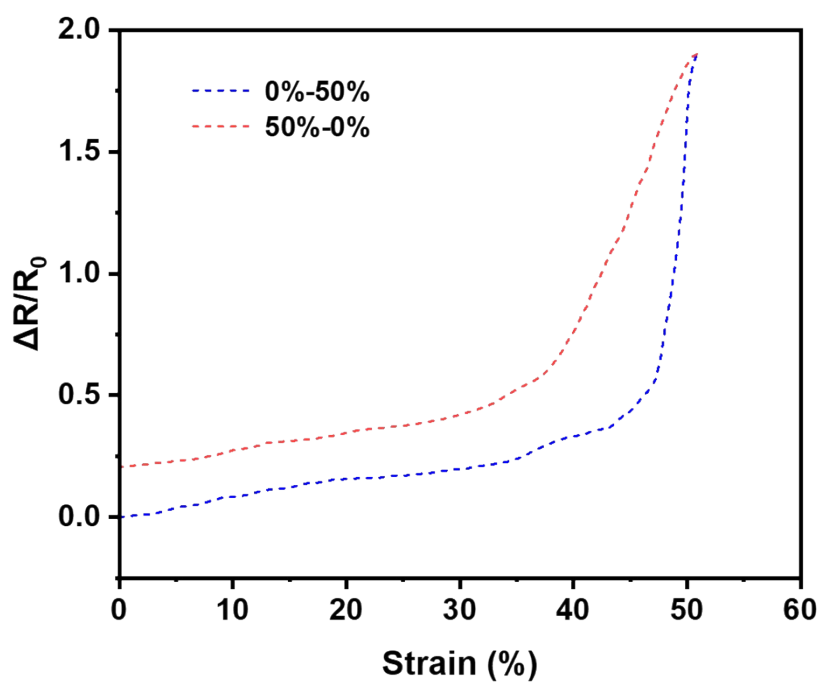

178

179 **Figure S16.** The resistance behavior during a complete stretch-release cycle from 0% to 50% strain and back  
180 to 0%.

181

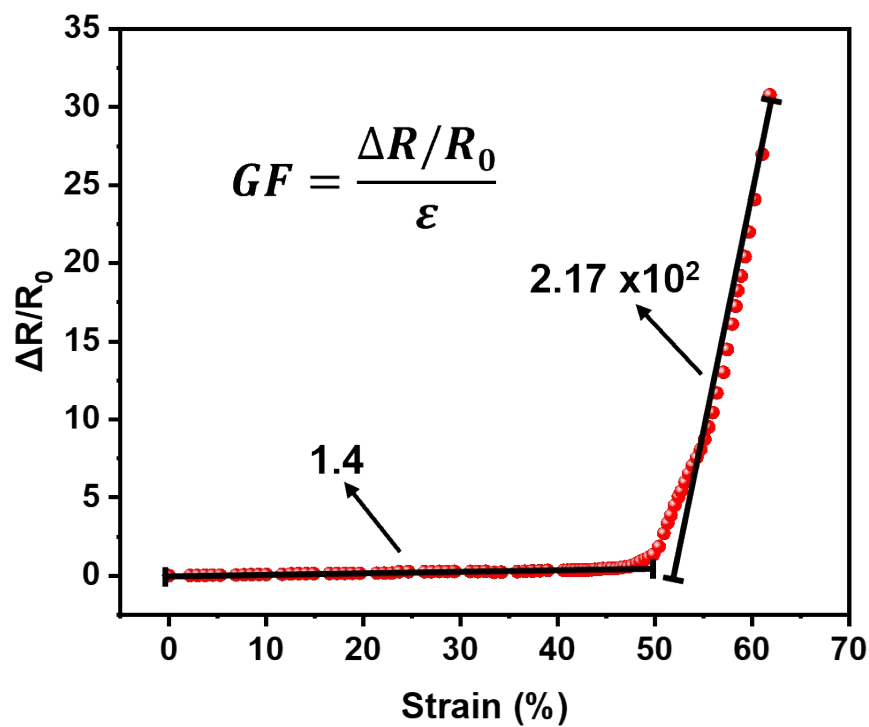

Figure S17. GF evaluation in the moderate strain range (0%-60%).



187 **Section 12. Comparison between Leaf Vein-Architected AuNWs Ecoflexible**

188 **Sensor and PDMS Film-Based AuNWs Sensor**

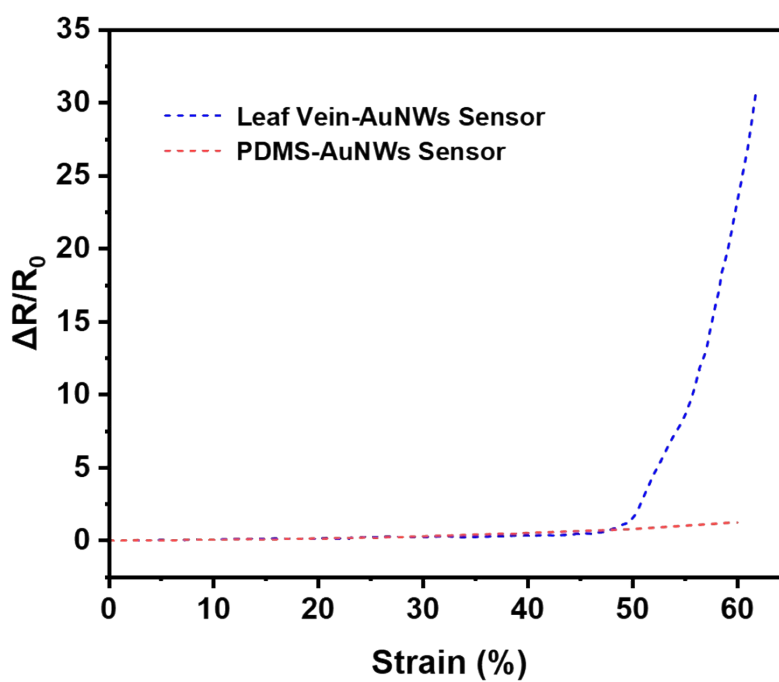

189

190 **Figure S18.** Comparison of strain-dependent resistance responses between leaf vein-based and PDMS film-  
191 based AuNWs sensors.

192

193 **Section 13. Current-Voltage Response under Strain**

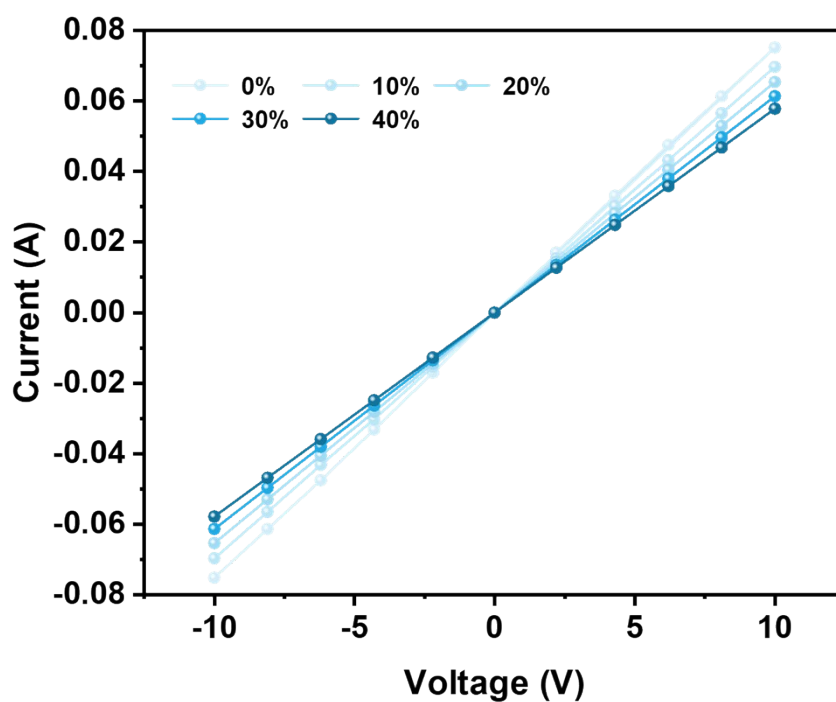

194  
 195 **Figure S19.** I-V curves of the leaf vein-architected AuNWs ecoflexible sensor under 0%, 10%, 20%, 30%,  
 196 and 40% strain.

197

198

199 **Section 14. Real Time Detection of Wrist Pulse Signals**

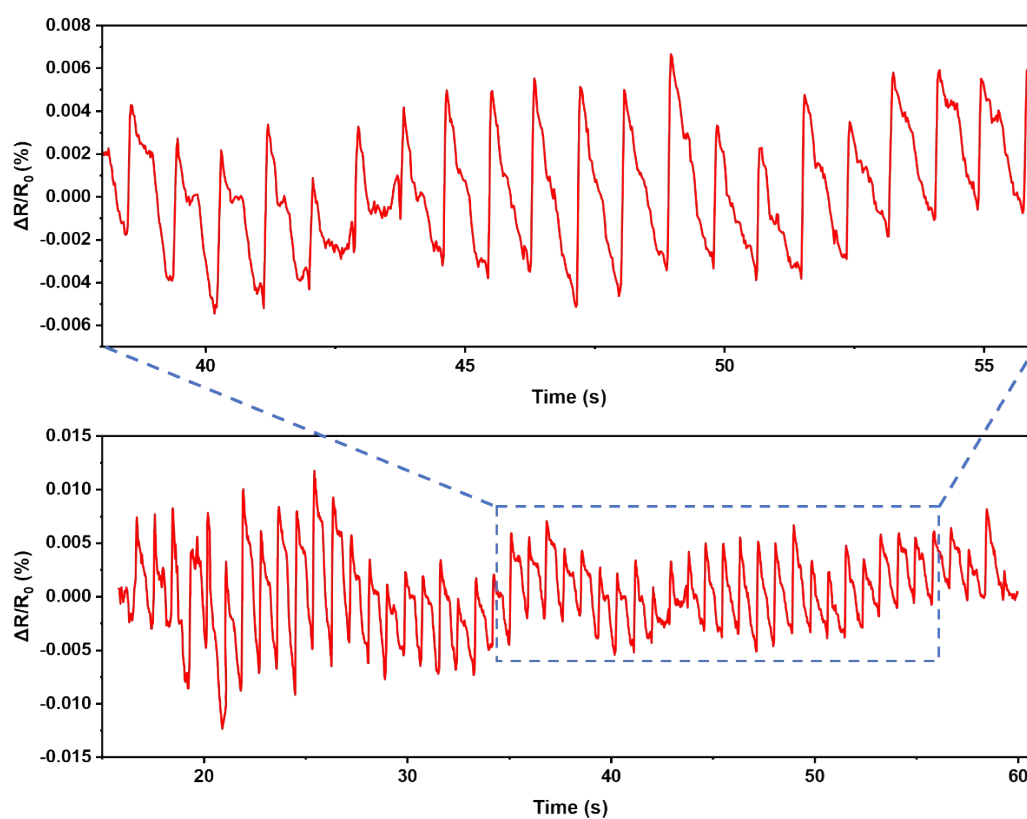

200  
201 **Figure S20.** Real time detection of wrist pulse signals using the leaf vein-architected AuNWs ecoflexible  
202 sensor.

205 **Section 15. Current-Voltage Response under Pressure**

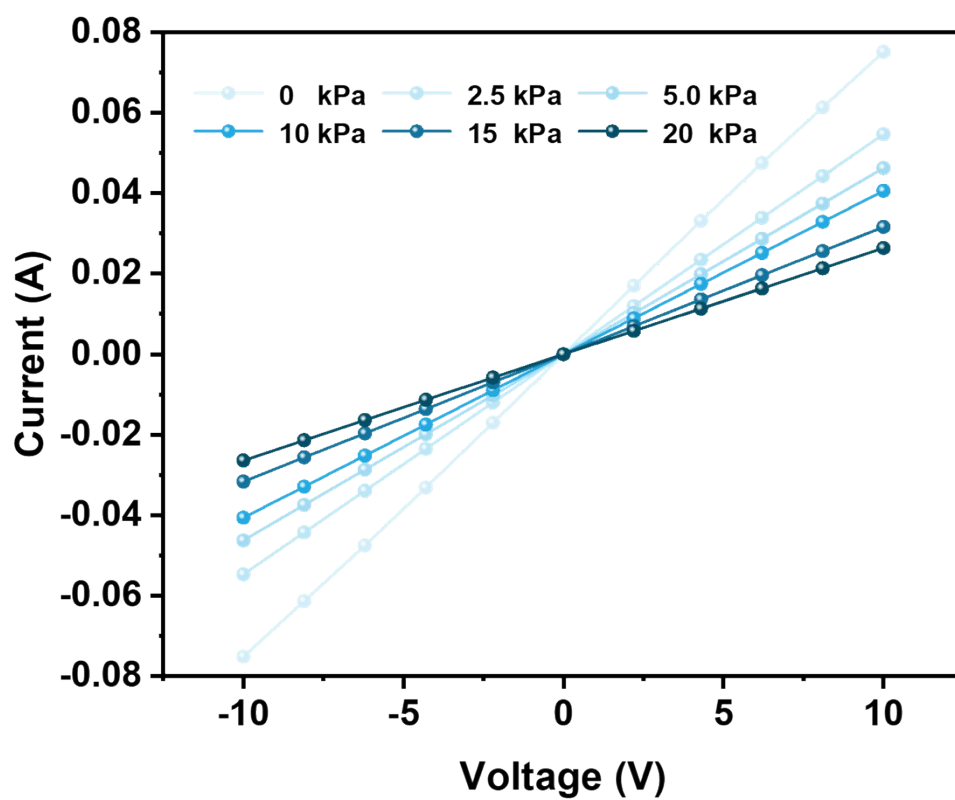

206

207 **Figure S21.** I-V curves of the leaf vein-architected AuNWs ecoflexible sensor under 0 kPa, 2.5 kPa, 5.0 kPa,  
 208 10 kPa, 15 kPa and 20 kPa.

209

210

211 **Section 16. Mechanism of Resistance Variation under Mechanical**

212 **Deformation**

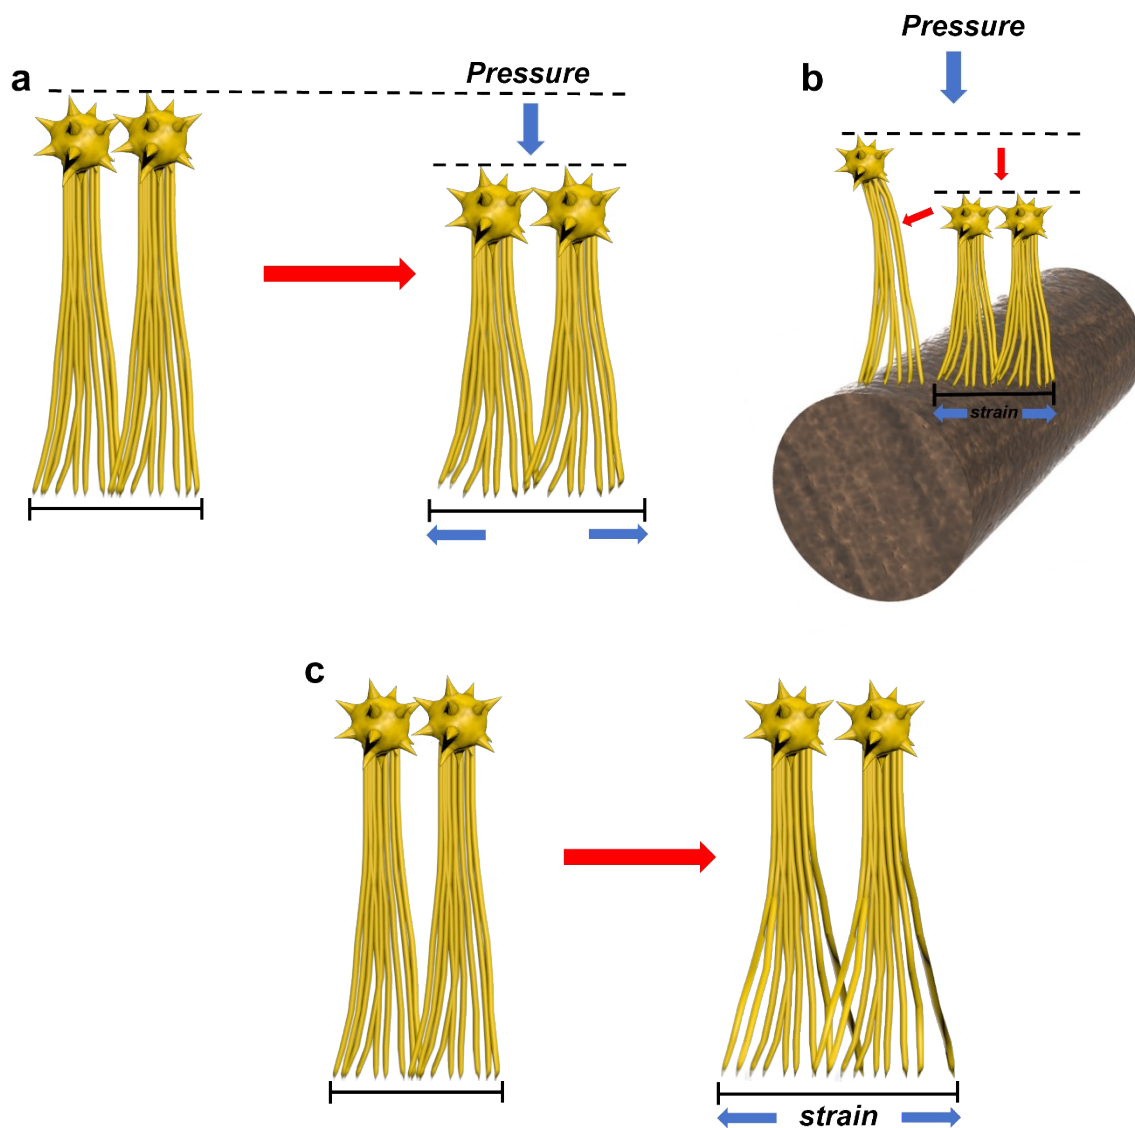

213  
214 **Figure S22.** (a) Compressive deformation and conductive pathway dilution. (b) Structural reconfiguration  
215 guided by leaf vein structure. (c) Tensile deformation and conductive pathway dilution.

216

217

218 **Section 17. Stepwise Pressure Response Curve of the Leaf Vein-architected**

219 **AuNWs Ecoflexible Sensor**

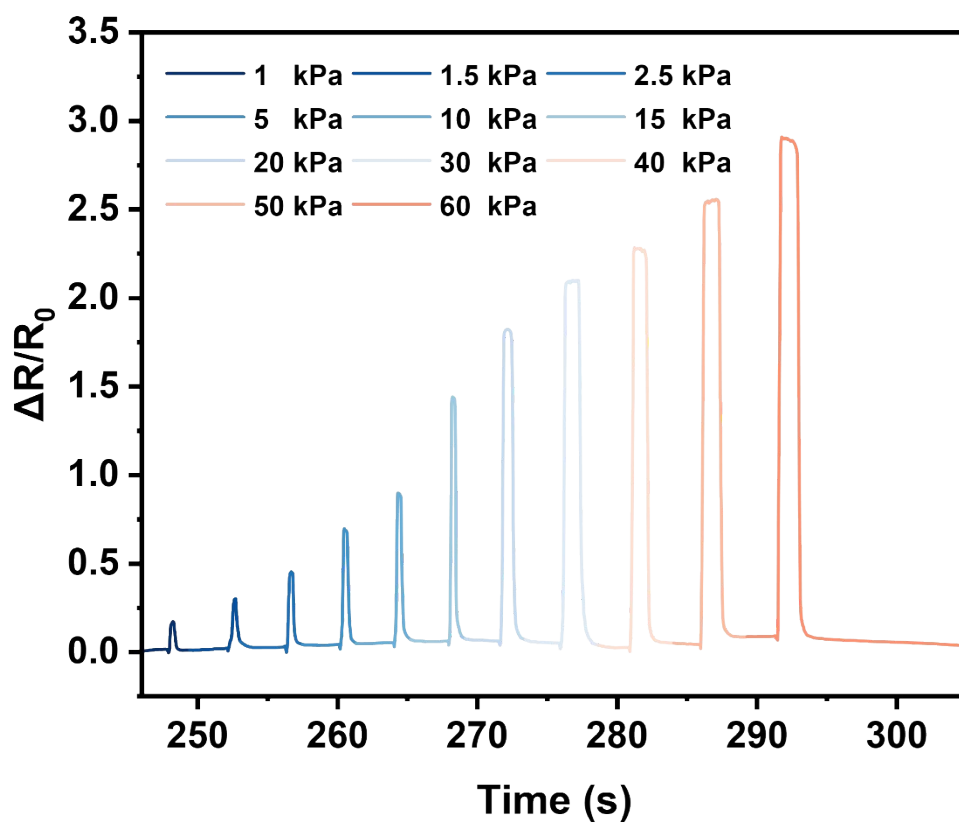

220

221 **Figure S23.** Multi-level pressure response curve of the leaf vein-architected AuNWs ecoflexible sensor  
 222 within a 1-60 kPa range.

223

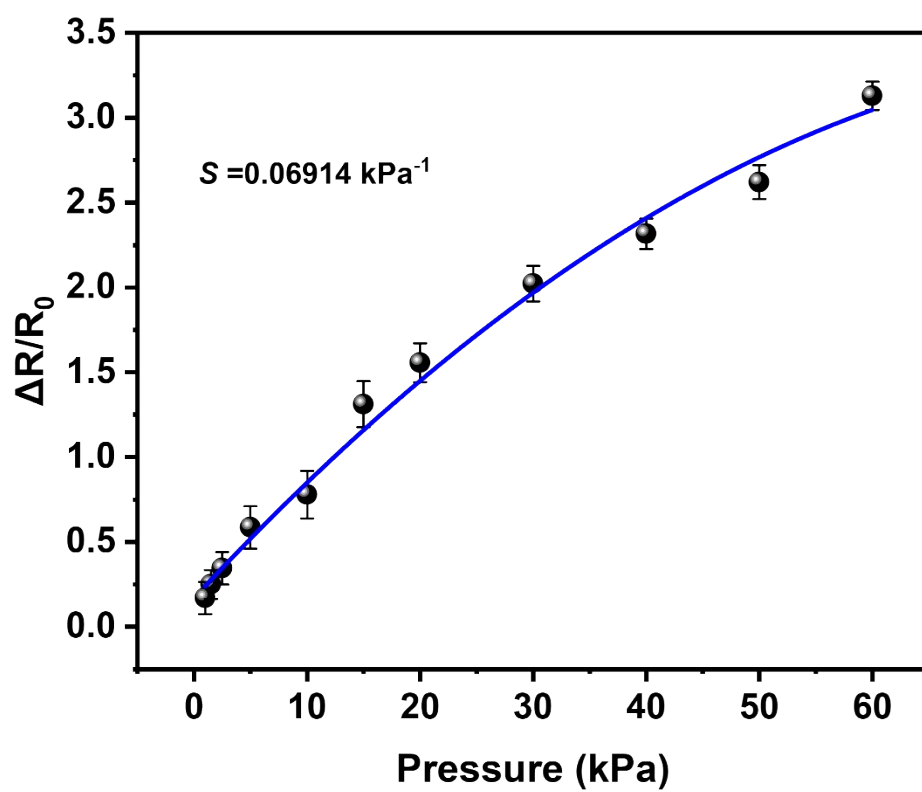

**Figure S24.** Sensitivity of the leaf vein-architected AuNWs ecoflexible sensor.

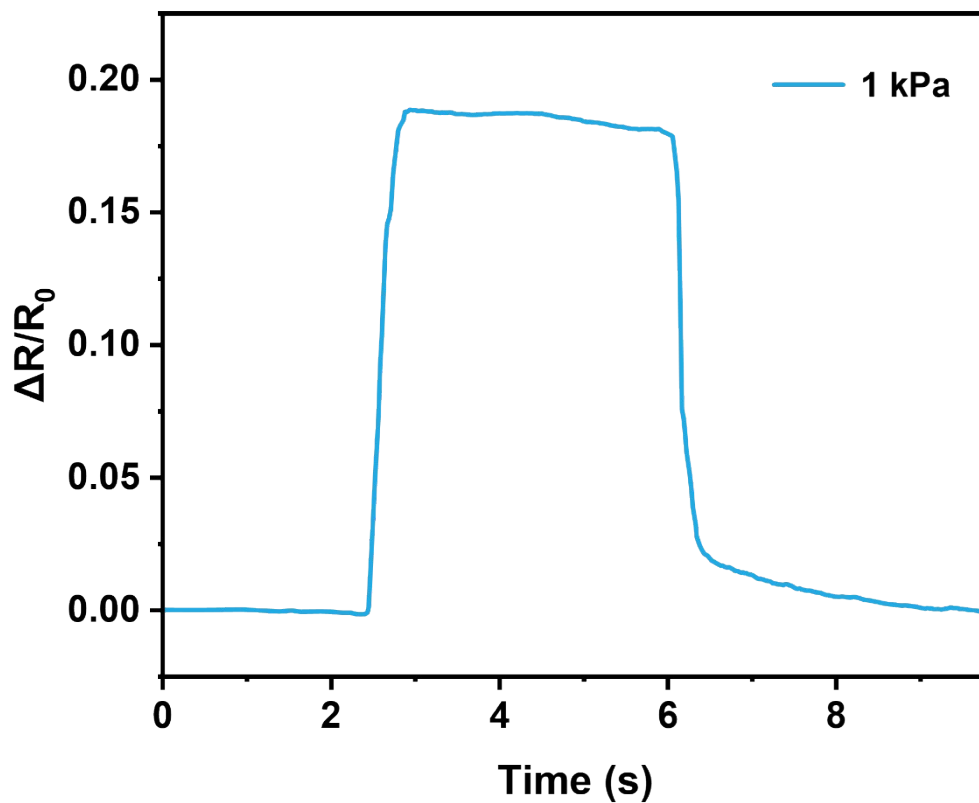

**Figure S25.** Hysteresis behavior of the leaf vein-architected AuNWs Ecoflexible Sensor under a loading-unloading process at 1 kPa.



## 233 **References**

- 234 1. H. Yuan, C. G. Khoury, H. Hwang, C. M. Wilson, G. A. Grant and T. Vo-Dinh, *Nanotechnology*, 2012, **23**,  
235 075102.
- 236 2. Y. Wang, S. Gong, S. J. Wang, X. Yang, Y. Ling, L. W. Yap, D. Dong, G. P. Simon and W. Cheng, *ACS*  
237 *Nano*, 2018, **12**, 9742-9749.
- 238 3. H. Zhang, F. Lin, W. Cheng, Y. Chen and N. Gu, *Adv. Funct. Mater.*, 2022, **33**, 2209760.  
239
